# Supplementary material for: Translation of the circular RNA circβ-catenin promotes liver cancer cell growth through activation of the Wnt pathway
Source: PubMed Central journal article supplement (PMC6486691; doi:10.1186/s13059-019-1685-4), 2019-04-26
Supplement: 13059_2019_1685_MOESM2_ESM.pdf [file 13059_2019_1685_MOESM2_ESM.pdf]

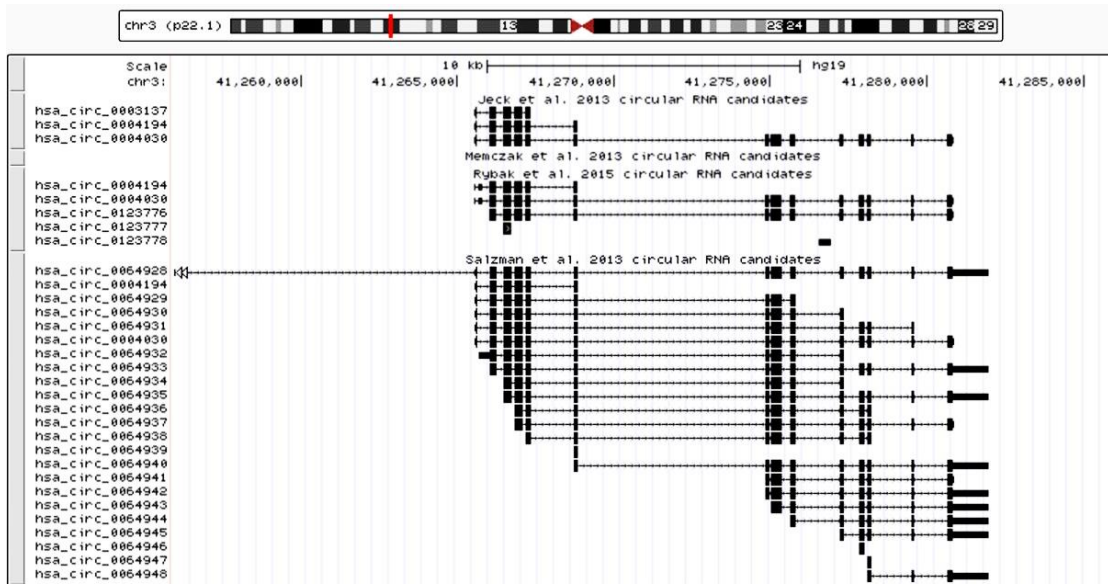

Figure S1 The sequencing data of circ $\beta$ -catenin from database circBase.

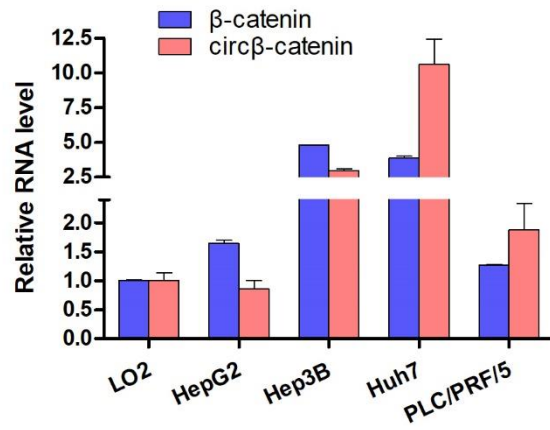

Figure S2 The RNA levels of circ $\beta$ -catenin were examined in the normal liver cell line LO2 and four liver cancer cell lines. RPLP0 gene was used as reference gene for normalization and its mRNA levels do not change across cell lines.

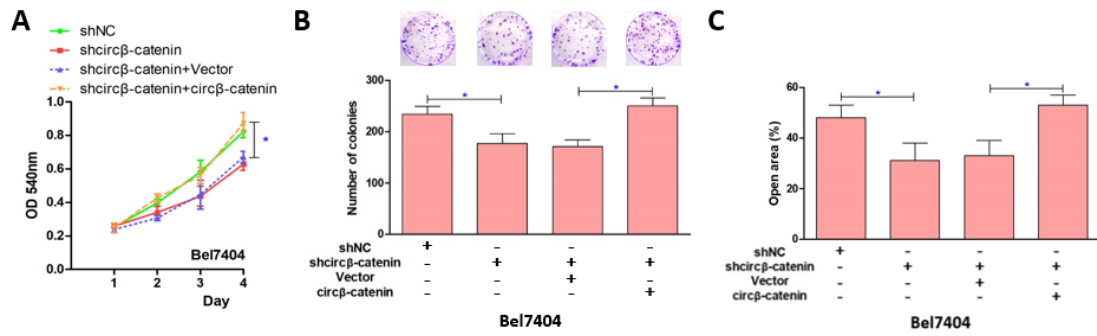

Figure S3 The Bel7404 cells with stable knock down of circβ-catenin were transfected with empty vector or circβ-catenin expression vector. MTT assay (A), colony formation assay (B) and wound healing assay (C) showed that the circβ-catenin overexpression vector could rescue the shRNA-mediated phenotypes. (n=4 ;\*,  $P < 0.05$ )

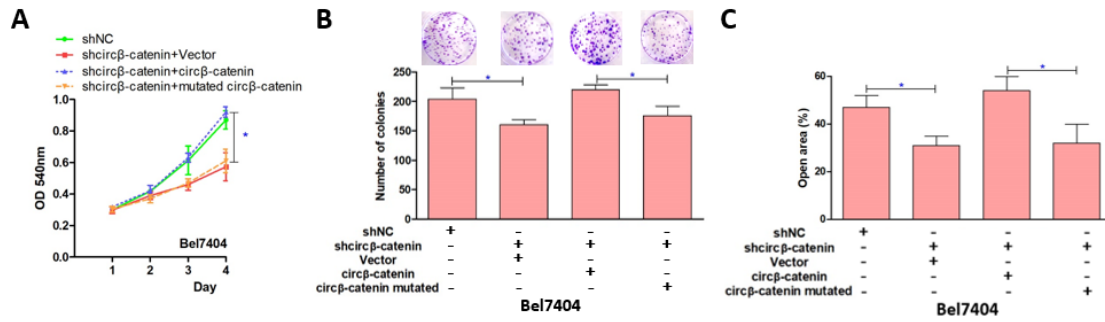

Figure S4 The Bel7404 cells with stable knock down of circ $\beta$ -catenin were transfected with empty vector, circ $\beta$ -catenin expression vector or circ $\beta$ -catenin expression vector with mutated start codon. MTT assay (A), colony formation assay (B) and wound healing assay (C) showed that the circ $\beta$ -catenin overexpression vector can rescue the shRNA-mediated phenotypes while the mutated expression vector failed to rescue them. (n=4 ;\*,  $P < 0.05$ )

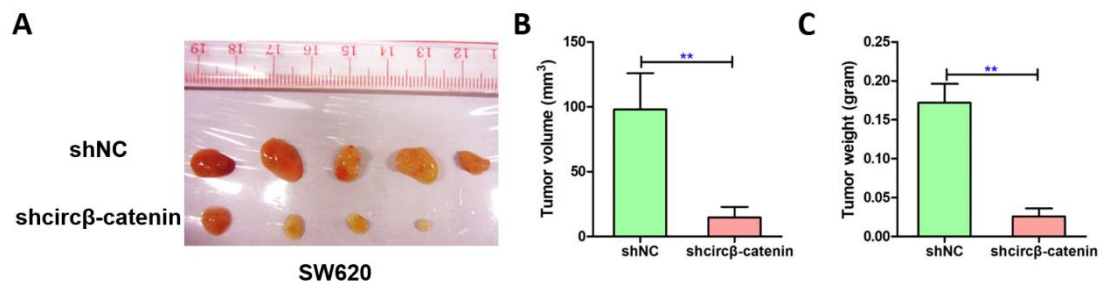

Figure S5 Knockdown of circ $\beta$ -catenin suppressed *in vivo* tumor growth.

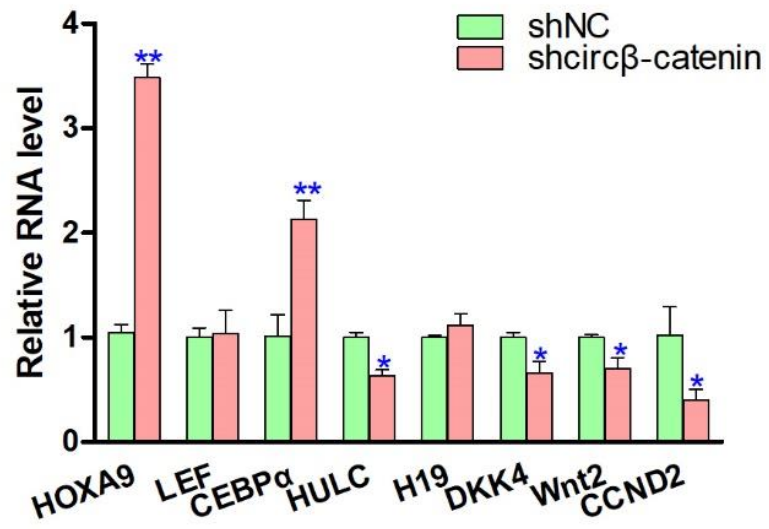

Figure S6 Validation of the sequencing data by using RT-PCR examination.

| Transcript id                                                                                                     | Exon information                                                                                                                                                                                                                                                                                                                                                                                                                                   |              |                             |                               |
|-------------------------------------------------------------------------------------------------------------------|----------------------------------------------------------------------------------------------------------------------------------------------------------------------------------------------------------------------------------------------------------------------------------------------------------------------------------------------------------------------------------------------------------------------------------------------------|--------------|-----------------------------|-------------------------------|
| NM_001904, NM_001098209,<br>NM_001098210                                                                          | Spliced_len                                                                                                                                                                                                                                                                                                                                                                                                                                        | Exon Number  | Exon Sizes                  | Exon Offsets                  |
|                                                                                                                   | 1129                                                                                                                                                                                                                                                                                                                                                                                                                                               | 6            | 61, 228, 254, 239, 202, 145 | 0, 505, 933, 1313, 1639, 3187 |
|  <b>Protein coding potential</b> |                                                                                                                                                                                                                                                                                                                                                                                                                                                    |              |                             |                               |
| <b>IRES Elements</b>                                                                                              | Parameter Index                                                                                                                                                                                                                                                                                                                                                                                                                                    |              |                             |                               |
|                                                                                                                   | Position (start--end)                                                                                                                                                                                                                                                                                                                                                                                                                              | R Score      | With Pseudoknot (Y/N)       |                               |
|                                                                                                                   | 760--866                                                                                                                                                                                                                                                                                                                                                                                                                                           | 1.543406     | Y                           |                               |
|                                                                                                                   | 46--70                                                                                                                                                                                                                                                                                                                                                                                                                                             | 1.366318     | Y                           |                               |
| <b>Open Reading Frame (ORF)</b>                                                                                   | Start Position                                                                                                                                                                                                                                                                                                                                                                                                                                     | End Position | Protein Length              |                               |
|                                                                                                                   | 49                                                                                                                                                                                                                                                                                                                                                                                                                                                 | 1r+32        | 370 aa                      |                               |
|                                                                                                                   | <p>MATQADLMEL DMAMEPDRKA AVSHWQQQSY LDSGIHSGAT TTAPSLSGKG NPEEEDVDTS QVLYEWEQGF SQSFTQEQVA<br/> DIDGQYAMTR AQRVRAAMFP ETLDEGMQIP STQFDAAHPT NVQRLAEP SQ MLKHAVVNLI NYQDDAELAT RAIPELTKLL<br/> NDEDQVVVVK AAVMVHQLSK KEASRHAIMR SPQMVSIVR TMQNTNDVET ARCTAGTLHN LSHHREGLLA IFKSGGIPAL<br/> VKMLGSPVDS VLFYAITTLH NLLHQEGAK MAVRLAGGLQ KMVALLNKTN VKFLAITTDC LQILAYGNQE SKLIILASGG<br/> PQALVNIMRT YTYEKLLWTT SRVLKVLVSV SSKNPAIVEA GYLKYTIQLF *</p> |              |                             |                               |
| <p>Note:<br/> (1). nr represents n rounds(n&lt;3);      (2). * represents a stop codon.</p>                       |                                                                                                                                                                                                                                                                                                                                                                                                                                                    |              |                             |                               |

Figure S7 Evaluation of the coding capacity of circ $\beta$ -catenin.

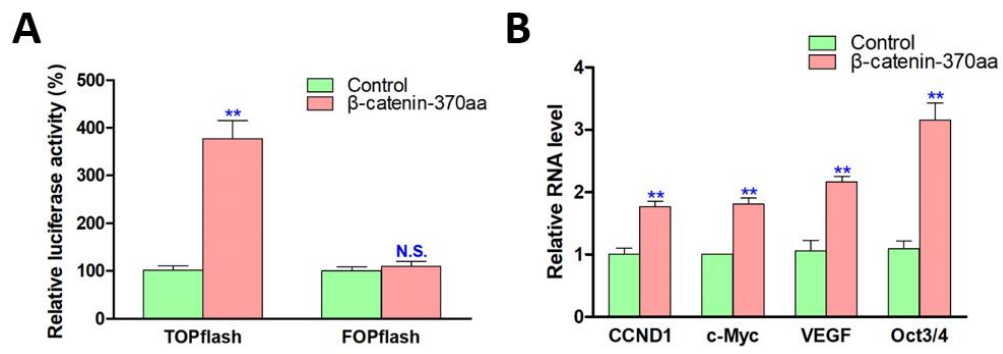

Figure S8  $\beta$ -catenin-370aa activated Wnt/ $\beta$ -catenin pathway.
