# Supplementary material for: Translation of the circular RNA circβ-catenin promotes liver cancer cell growth through activation of the Wnt pathway
Source: PubMed Central journal article supplement (PMC6486691; doi:10.1186/s13059-019-1685-4), 2019-04-26
Supplement: 13059_2019_1685_MOESM5_ESM.pdf [file 13059_2019_1685_MOESM5_ESM.pdf]

| <b>Name</b>                             | <b>Primer sequences used for plasmid construction</b>           |
|-----------------------------------------|-----------------------------------------------------------------|
| pcDNA3.1-3XHA- $\beta$ -catenin-370aa-F | CGGAATTCCGCTACTCAAGCTGATTTGAT                                   |
| pcDNA3.1-3XHA- $\beta$ -catenin-370aa-R | AAGGTACCTCAAAACAGTTGTATGGTATACTTCAAA<br>TACCCAGCTTCTACAATAGCCGG |
| circ $\beta$ -catenin-shRNA-F           | GATCCGCTGGGTATTTGAAGTATATTCAAGAGATAT<br>ACTTCAAATACCCAGCTTTTTT  |
| circ $\beta$ -catenin-shRNA-R           | AATTAATAAAGCTGGGTATTTGAAGTATATCTCTTG<br>AATAACTTCAAATACCCAGCG   |
| circ $\beta$ -catenin-F                 | CCGATATCCCGATTTGAAGTATACCATA                                    |
| circ $\beta$ -catenin-R                 | TCCCCGCGGTGACTTCTACAATAGCCGGC                                   |
| <b>Name</b>                             | <b>Primer sequences used for RT-PCR</b>                         |
| U1-F                                    | TGATCACGAAGGTGGTTTTCC                                           |
| U1-R                                    | GCACATCCGGAGTGCAATG                                             |
| $\beta$ -actin-F                        | AAGATGACCCAGATCATGTTTGAG                                        |
| $\beta$ -actin-R                        | GCAGCTCGTAGCTCTTCTCCAG                                          |
| RPLP0-F                                 | CCGGATATGAGGCAGCAGTT                                            |
| RPLP0-R                                 | GAAGGCTGTGGTGCTGATGG                                            |
| $\beta$ -catenin-F                      | GGGTCCTCTGTGAACCTTGCTC                                          |
| $\beta$ -catenin-R                      | TTCTTGTAATCTTGTGGCTTGTC                                         |
| circ $\beta$ -catenin-F                 | AGTGCTGAAGGTGCTATCTGT                                           |
| circ $\beta$ -catenin-R                 | AGGTAAGACTGTTGCTGCCA                                            |
| CCND2-F                                 | ACCTTCCGCAGTGCTCCTA                                             |
| CCND2-R                                 | CCCAGCCAAGAAACGGTCC                                             |
| HOXA9-F                                 | TACGTGGACTCGTTCCTGCT                                            |
| HOXA9-R                                 | CGTCGCCTTGGACTGGAAG                                             |
| H19-F                                   | TGCTGCACTTTACAACCACTG                                           |
| H19-R                                   | ATGGTGTCTTTGATGTTGGGC                                           |
| HULC-F                                  | AACCTCCAGAACTGTGAT                                              |
| HULC-R                                  | CATAATTCAGGGAGAAAG                                              |
| Wnt2-F                                  | GATGCGTGCCATTAGCCAG                                             |
| Wnt2-R                                  | AGATTCCCGACTACTTCGGAG                                           |
| DKK4-F                                  | ACGGACTGCAATACCAGAAAG                                           |
| DKK4-R                                  | CGTTCACACAGAGTGTCCCAG                                           |
| <b>Name</b>                             | <b>siRNA sequences</b>                                          |
| siL1                                    | GCUUGGAAUGAGACUGCUG                                             |
| siL2                                    | GAAUGCAGUUCGCCUUCAC                                             |
| siC                                     | GCUGGGUAUUUGAAGUAUA                                             |
| siNC                                    | UUCUCCGAACGUGUCACGU                                             |
